# Supplementary material for: Cannabinoid Receptor Type-2 in B Cells Is Associated with Tumor Immunity in Melanoma
Source: MDPI journal article supplement (doi:10.3390/cancers13081934), 2021-04-16
Supplement: s1 [file s1]

Article

Cannabinoid receptor type-2 in B cells is associated with tumor immunity in melanoma

Supplementary material

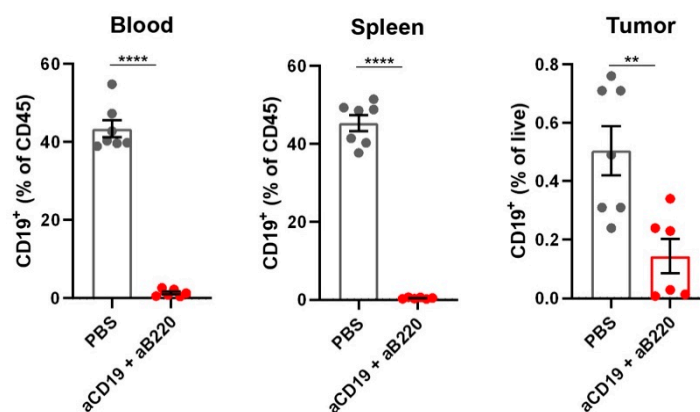

**Figure S1. CD19<sup>+</sup> B cell frequencies in indicated tissues with or without B cell depletion.** B cells were depleted using anti-CD19 and anti-B220 depleting antibodies and analyzed at day 14 post tumor inoculation by flow cytometry (n = 6-7). Statistical analyses were performed using two-tailed, unpaired student's *t*-tests. Error bars show mean  $\pm$  SEM. \*  $p \leq 0.05$ ; \*\*\*\*  $p \leq 0.0001$ .
